# Supplementary material for: Saponin-enhanced biomass accumulation and demulsification capability of the demulsifying bacteria Alcaligenes sp. S-XJ-1
Source: Royal Society of Chemistry journal article supplement (doi:10.1039/c6ra02237e), 2016-01-01
Supplement: c6ra02237e1.pdf [file c6ra02237e1.pdf]

## Supplementary Data

Saponin-enhanced biomass accumulation and demulsification capability of the  
demulsifying bacteria *Alcaligenes* sp. S-XJ-1

Xiangfeng Huang,<sup>a</sup> Yuyan Zhang,<sup>a</sup> Yansong Wei,<sup>a</sup> Jia Liu,<sup>a</sup> Lijun Lu<sup>a</sup>

and Kaiming Peng<sup>\*b</sup>

<sup>a</sup>*College of Environmental Science and Engineering, State Key Laboratory of  
Pollution Control and Resource Reuse, Ministry of Education Key Laboratory of  
Yangtze River Water Environment, Tongji University, Shanghai 200092, China. E-  
mail: hxf@mail.tongji.edu.cn; yuyanzh2012@126.com; wdcq32@gmail.com;  
liujia@tongji.edu.cn; lulijun@tongji.edu.cn*

<sup>b</sup>*Tongji University, Shanghai 200092, China. E-mail: [kai878@sina.com](mailto:kai878@sina.com)*

No. of pages: 11

No. of methods: 4

No. of figures: 5

No. of tables: 2

\* Corresponding Author:

Tel: +86 21 65982399

Fax: +86 21 65982399

Email: [kai878@sina.com](mailto:kai878@sina.com)

## Surface free energy calculation:

Apolar Lifshitz-van der Waals ( $\gamma_b^{LW}$ ) component and polar electron-donor ( $\gamma_b^-$ ) and electron-acceptor ( $\gamma_b^+$ ) parameters of bacterial surface were estimated by putting the measured contact angles ( $\theta_i$ ) along with known total surface tension ( $\gamma_i^L$ ) and parameters  $\gamma_i^{LW}$ ,  $\gamma_i^-$ , and  $\gamma_i^+$  of the three probe liquids (distilled water, formamide, and diiodomethane, Table S1) into the Young–Dupre equation (1).<sup>1</sup>

Table S1. Components and parameters of the surface free energy of probe liquids.

| Probe liquids | Surface free energy (mJ/m <sup>2</sup> ) |            |            |            |
|---------------|------------------------------------------|------------|------------|------------|
|               | $\gamma^{LW}$                            | $\gamma^+$ | $\gamma^-$ | $\gamma^L$ |
| Water         | 21.8                                     | 25.5       | 25.5       | 72.8       |
| Formamide     | 39                                       | 2.28       | 39.6       | 58         |
| Diiodomethane | 50.8                                     | 0          | 0          | 50.8       |

$$\sqrt{\gamma_i^{LW}} \times \sqrt{\gamma_b^{LW}} + \sqrt{\gamma_i^+} \times \sqrt{\gamma_b^-} + \sqrt{\gamma_i^-} \times \sqrt{\gamma_b^+} = (1 + \cos \theta_i) \times \frac{\gamma_i^L}{2} \quad (1)$$

The free energy of the interfacial interaction between two bacterial cells immersed in water ( $\Delta G_{bwb}$ ) for each sample was calculated by Eq. (2).<sup>2</sup>

$$\Delta G_{bwb} = -2 \times \left( \sqrt{\gamma_b^{LW}} - \sqrt{\gamma_w^{LW}} \right) - 4 \times \left( \sqrt{\gamma_b^+ \times \gamma_b^-} + \sqrt{\gamma_w^+ \times \gamma_w^-} - \sqrt{\gamma_b^+ \times \gamma_w^-} - \sqrt{\gamma_b^- \times \gamma_w^+} \right) \quad (2)$$

## Literature cited

1. C. J. van Oss, *Colloids Surf., B*, 1995, **5**, 91–110.
2. K. M. Peng, J. Liu, L. J. Lu, W. Yin and X. F. Huang, *J. Adhes. Sci. Technol.*, 2016, **30**, 194–209.

### Cell-surface substance analysis:

The translation of the elemental differences from XPS into the three major classes of proteins, lipids, and polysaccharides was presented as follows:

Chemical compositions on cell-surface were modeled in terms of three classes: proteins (Pr), polysaccharides (Ps) with a general formula  $(C_6H_{10}O_5)_n$ , and lipids (Lp) that refer to compounds containing mainly carbon and hydrogen. The compositions were calculated with the proportion of elements determined by XPS, according to the following set of equations (3–5):<sup>3,4</sup>

$$[N/C] = 0.279(C_{Pr}/C) \quad (3)$$

$$[O/C] = 0.325(C_{Pr}/C) + 0.833(C_{Ps}/C) \quad (4)$$

$$[C/C] = (C_{Pr}/C) + (C_{Ps}/C) + (C_{Lp}/C) \quad (5)$$

### Literature cited

3. J. Burgain, C. Gaiani, G. Francius, A. M. Revol-Junelles, C. Cailliez-Grimal, S. Lebeer, H. L. P. Tytgat, J. Vanderleyden and J. Scher, *Colloids Surf., B*, 2013, **104**, 153–162.
4. P. G. Rouxhet and M. J. Genet, *Surf. Interface Anal.*, 2011, **43**, 1453–1470.

**Measurement of critical micelle concentration:**

The surface tensions of saponin solutions were measured by a platinum plate method using an automatic surface tensiometer (DT-102; Huakun Instrument Co., Ltd., Shandong, China). The concentrations of solutions were between 0.006% and 0.5% (w/v). The CMC of saponin was the concentrations at which the surface tension first reached its minimum. This experiment was conducted in triplicate at a temperature of 27°C.

### **Adsorption and desorption tests:**

Two kinds of biomass were used for the adsorption and desorption tests: one was the biomass cultivated with rape oil for 7 days (marked as “biomass-R”), and the other was the biomass cultivated with rape oil and saponin additives (0.1%, 0.5%, and 1%) for 7 days (marked as “biomass-RS”). In the adsorption tests, equal amounts of inactive biomass-R (as an “adsorbent”) were mixed with saponin (0.01%, 0.03%, 0.05%, 0.1%, 0.5%, and 1%, w/v) in PBS (pH=7) for 24 h at 130 rpm before centrifugation. In the desorption tests, equal amounts of inactive biomass-RS were added to an equal volume of deionized water and mixed for 5 min at 1000 rpm before centrifugation. After centrifugation, the saponin concentration in the supernatant was determined by spectrophotometry,<sup>5</sup> and the harvested bacteria were used to estimate demulsification. The adsorbed or desorbed amount of saponin per gram biomass and the adsorption or desorption ratio were evaluated. The values presented are averages of triplicate samples.

### **Literature cited**

5. J. Yan, Z. L. Wu, Y. L. Zhao and C. S. Jiang, *Sep. Purif. Technol.*, 2011, **80**, 300–305.

Figure S1. The surface tensions and CMC of saponin solutions.

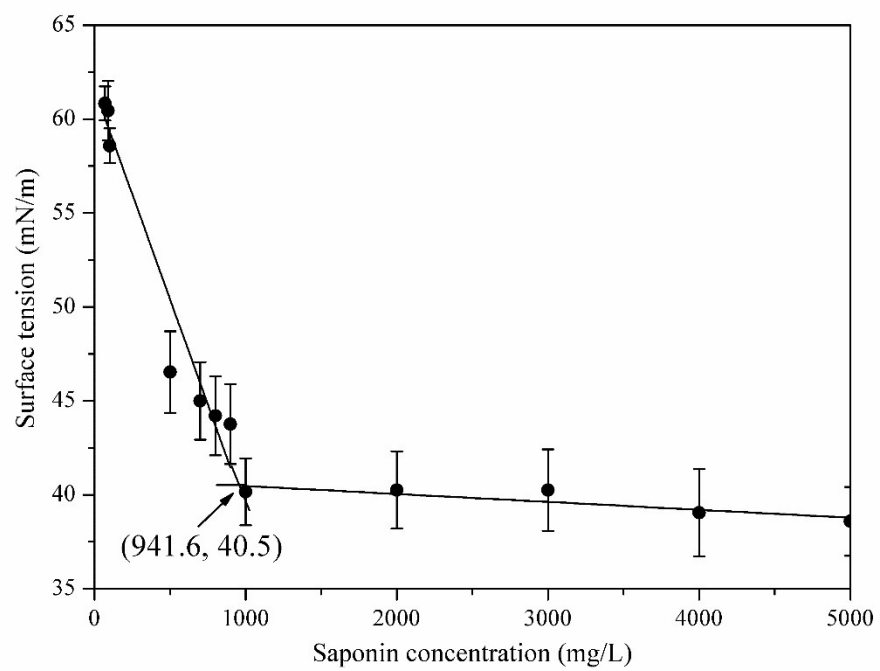

Figure S2. The relationship between contact angle and demulsification ratio.

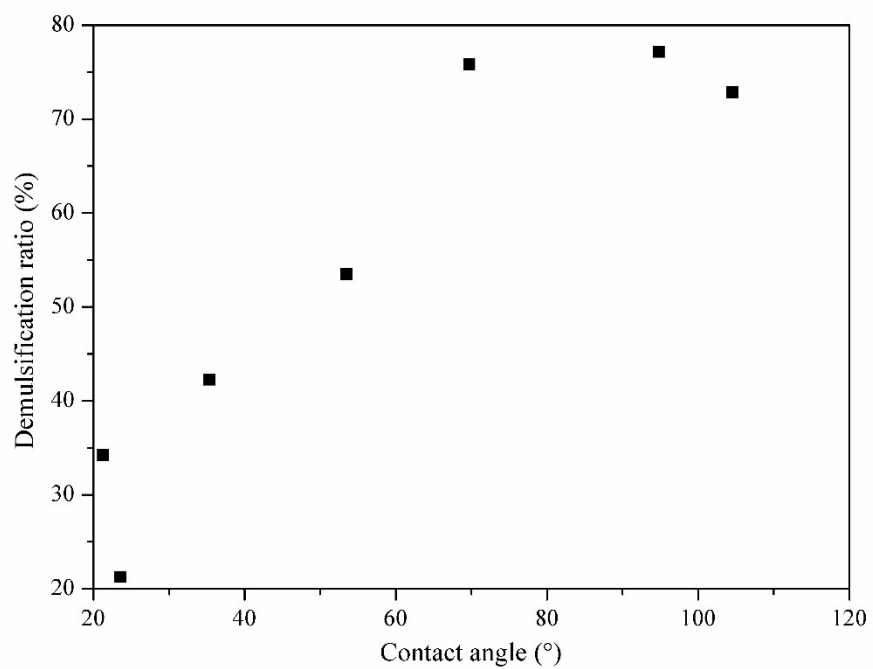

Figure S3. The effects of saponin at different concentrations on cell-surface functional groups.

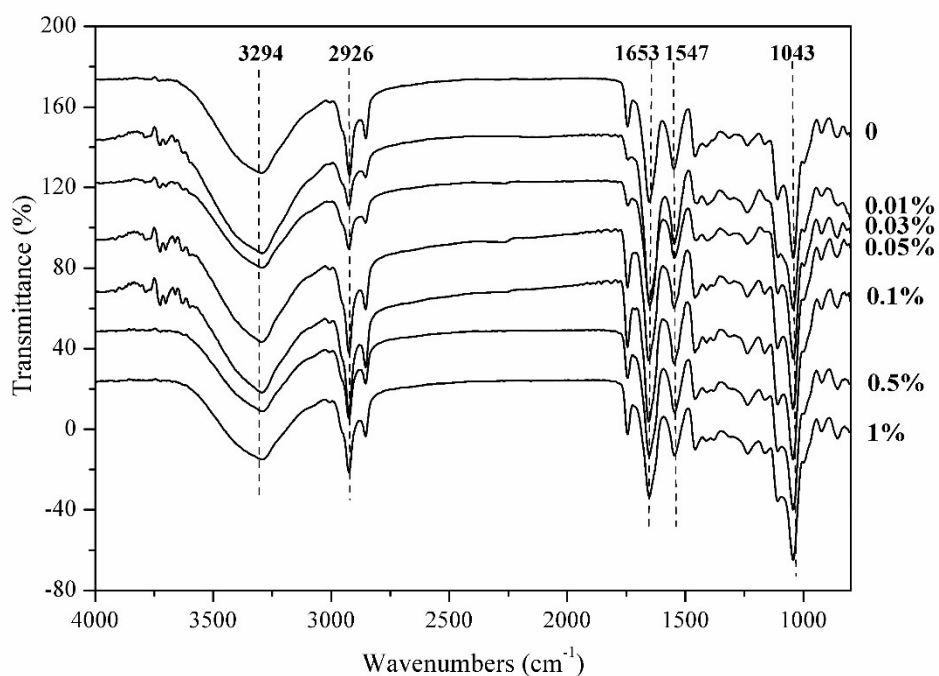

Results:

Obvious peaks were observed at 3294, 2926, 1653, 1547, and 1043 cm<sup>-1</sup> for all samples, and the corresponding functional groups were -OH, C-H, amide I (amide bond in the C=O stretching vibration), amide II bond (amide bond of the NH bending vibration), and O-C, respectively.



Figure S4. Adsorption (a) and desorption (b) of saponin and corresponding changes in demulsification.

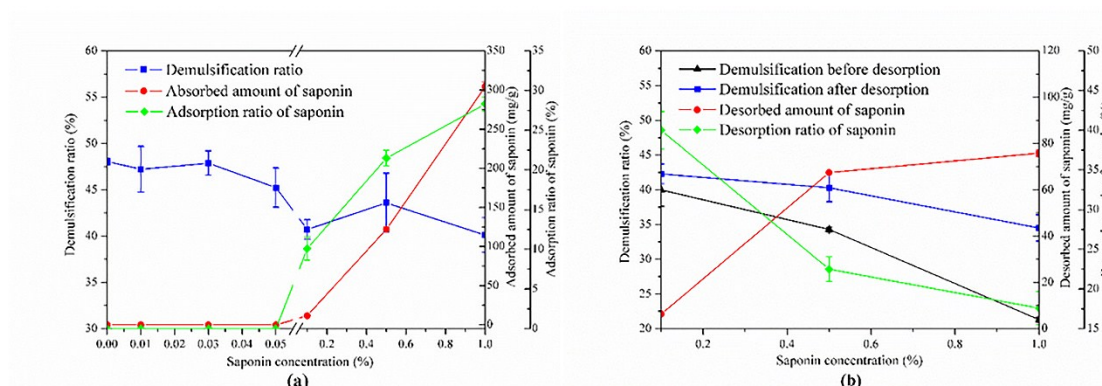

Results:

Demulsification was affected by the adsorption of saponin at high concentrations (0.1–1%) on *Alcaligenes* sp. S-XJ-1 cells, while the cells exhibited almost no adsorption for saponin at low concentrations (0.01–0.05%) (Fig. S4a). The desorption of saponin from *Alcaligenes* sp. S-XJ-1 improved demulsification (Fig. S4b), which also indirectly proved that the adsorption of saponin on bacteria did inhibit demulsification.

Figure S5. The relationship between protein content and the contact angle of the cell-surface.

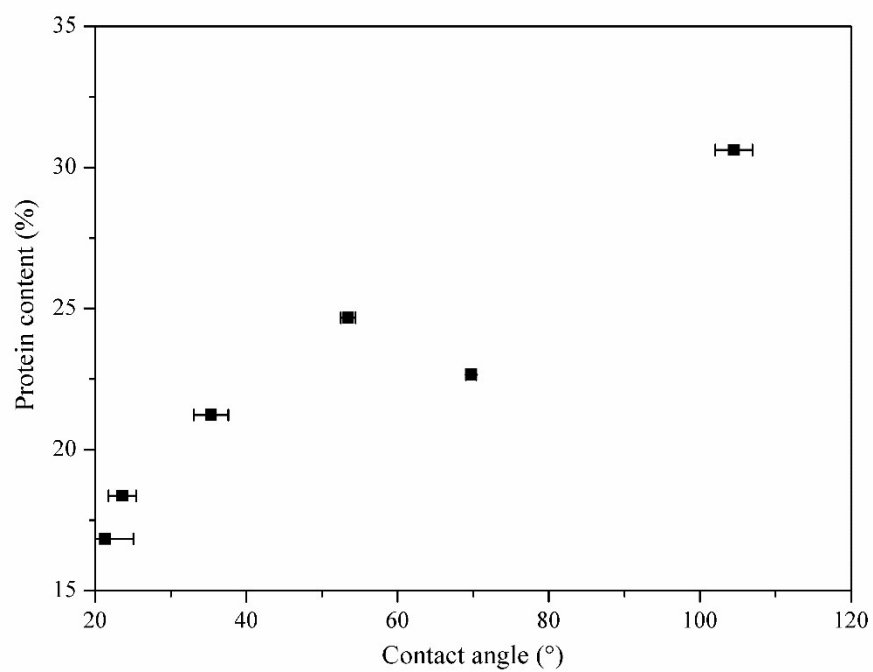

Table S2. Chemical compositions of the demulsifying strain S-XJ-1 cultivated with saponins at various concentrations.

| Saponin concentration<br>(%) | Total carbon<br>(%) | Total nitrogen<br>(%) | Total oxygen<br>(%) | Molar ratio vs total carbon |        |
|------------------------------|---------------------|-----------------------|---------------------|-----------------------------|--------|
|                              |                     |                       |                     | N/C                         | O/C    |
| 0                            | 75.10               | 4.20                  | 18.61               | 0.0559                      | 0.2478 |
| 0.01                         | 74.10               | 6.18                  | 18.88               | 0.0834                      | 0.2547 |
| 0.03                         | 74.79               | 5.27                  | 19.01               | 0.0705                      | 0.2542 |
| 0.05                         | 76.03               | 3.89                  | 18.97               | 0.0512                      | 0.2495 |
| 0.1                          | 77.22               | 3.64                  | 18.01               | 0.0472                      | 0.2332 |
| 0.5                          | 75.59               | 2.91                  | 20.92               | 0.0386                      | 0.2768 |
| 1                            | 76.50               | 3.16                  | 19.24               | 0.0413                      | 0.2515 |
